# Supplementary material
Source: publisher site journal article supplement (https://www.spandidos-publications.com/1807/downloadSupplementary)
Supplement: Supplementary file 1 [file downloadSupplementary]

## Sheet: Sheet1
Table SIII. Kyoto Encyclopedia of Genes and Genomes pathway enrichment analysis of the differentially expressed genes.
A, Upregulated genes
Term	Count	%	P-value	Genes	List Total	Pop Hits	Pop Total	Fold enrichment	Bonferroni	Benjamini
hsa04512:ECM-receptor interaction	16	4.14508	8.92283e-11	COL3A1, ITGA2, ITGA3, COL5A2, COL5A1, HMMR, LAMB3, SDC1, LAMA3, COMP, COL1A2, LAMC2, COL1A1, THBS2, COL11A1, FN1	136	87	6879	9.30223	1.36519e-08	1.36519e-08
hsa05146:Amoebiasis	13	3.36788	9.12755e-07	IL1R2, LAMB3, LAMA3, COL3A1, COL1A2, SERPINB2, LAMC2, COL1A1, SERPINB3, COL11A1, COL5A2, COL5A1, FN1	136	106	6879	6.20332	0.000139642	6.98233e-05
hsa04510:Focal adhesion	15	3.88601	4.67532e-05	COL3A1, MET, ITGA2, ITGA3, COL5A2, COL5A1, LAMB3, LAMA3, COMP, COL1A2, LAMC2, COL1A1, THBS2, COL11A1, FN1	136	206	6879	3.68307	0.00712788	0.00238163
hsa04974:Protein digestion and absorption	10	2.59067	5.08432e-05	KCNN4, COL17A1, COL3A1, COL1A2, COL12A1, COL1A1, COL11A1, COL5A2, COL5A1, COL10A1	136	88	6879	5.74783	0.00774903	0.00194291
hsa05200:Pathways in cancer	20	5.18135	0.000218422	WNT5A, BMP4, MMP9, MET, PPARG, EGLN3, LEF1, ITGA2, ITGA3, MMP1, WNT2, JUP, EDNRA, LAMB3, LAMA3, CDKN2B, SLC2A1, CKS2, LAMC2, FN1	136	393	6879	2.57409	0.0328698	0.00666214
hsa04151:PI3K-Akt signaling pathway	17	4.40415	0.00111106	COL3A1, MET, ITGA2, ITGA3, COL5A2, EPHA2, COL5A1, LAMB3, LAMA3, COMP, COL1A2, LAMC2, EFNA5, COL1A1, THBS2, COL11A1, FN1	136	345	6879	2.49239	0.156409	0.0279498
hsa05222:Small cell lung cancer	8	2.07254	0.00132573	LAMB3, LAMA3, CDKN2B, CKS2, ITGA2, LAMC2, ITGA3, FN1	136	85	6879	4.76055	0.183698	0.0285796
hsa04115:p53 signaling pathway	7	1.81347	0.00191175	CCNB1, CDK1, SERPINB5, RRM2, PMAIP1, SFN, IGFBP3	136	67	6879	5.28457	0.253811	0.0359355
hsa05202:Transcriptional misregulation in cancer	9	2.33161	0.0166567	PLAT, JUP, IL1R2, MMP9, PPARG, MET, MMP3, IGFBP3, PLAU	136	167	6879	2.72592	0.92346	0.248398
hsa04060:Cytokine-cytokine receptor interaction	11	2.84974	0.0208084	TNFRSF21, IL1R2, INHBA, TNFSF4, TNFSF11, CXCL5, IL20RB, CCL20, IL1RAP, CCL18, CXCL10	136	243	6879	2.28967	0.959936	0.275104
hsa00512:Mucin type O-Glycan biosynthesis	4	1.03627	0.0222543	GCNT3, GALNT5, C1GALT1, ST6GALNAC1	136	31	6879	6.52657	0.968043	0.268774
hsa05323:Rheumatoid arthritis	6	1.5544	0.0289472	CTSK, TNFSF11, CXCL5, CCL20, MMP3, MMP1	136	88	6879	3.4487	0.988827	0.312384
hsa04110:Cell cycle	7	1.81347	0.0347247	CCNB1, CDK1, CDKN2B, TTK, BUB1B, CDC20, SFN	136	124	6879	2.85537	0.995516	0.340285
hsa04611:Platelet activation	7	1.81347	0.0422214	COL3A1, COL1A2, ITGA2, COL1A1, COL11A1, COL5A2, COL5A1	136	130	6879	2.72359	0.99864	0.375899
hsa05205:Proteoglycans in cancer	9	2.33161	0.042593	WNT5A, WNT2, SDC1, MMP9, MET, ITGA2, PLAU, FN1, PLAUR	136	200	6879	2.27614	0.998718	0.358517
hsa04610:Complement and coagulation cascades	5	1.29534	0.046065	PLAT, CD55, F5, PLAU, PLAUR	136	69	6879	3.66528	0.999265	0.362987
hsa05144:Malaria	4	1.03627	0.0708847	SDC1, COMP, MET, THBS2	136	49	6879	4.12905	0.999987	0.484027
hsa05217:Basal cell carcinoma	4	1.03627	0.0890507	WNT5A, WNT2, BMP4, LEF1	136	54	6879	3.74673	0.999999	0.547414
B, Downregulated genes
Term	Count	%	P-value	Genes	List Total	Pop Hits	Pop Total	Fold Enrichment	Bonferroni	Benjamini
hsa04972:Pancreatic secretion	19	8.11966	5.88055e-15	PNLIP, FXYD2, CELA3A, PNLIPRP1, CELA3B, PNLIPRP2, CFTR, CEL, CHRM3, PRSS2, PRSS3, CPA2, PLA2G1B, CELA2B, CELA2A, CPA1, SLC4A4, CPB1, CTRL	115	93	6879	12.2208	9.7089e-13	9.7089e-13
hsa04974:Protein digestion and absorption	13	5.55556	1.70771e-08	CELA3A, FXYD2, CELA3B, SLC16A10, PRSS2, PRSS3, CPA2, CELA2B, CELA2A, SLC3A1, CPA1, CPB1, CTRL	115	88	6879	8.83666	2.81772e-06	1.40886e-06
hsa00260:Glycine, serine and threonine metabolism	8	3.4188	2.83168e-06	CTH, GATM, PHGDH, GCAT, GAMT, GNMT, PSAT1, CBS	115	39	6879	12.2702	0.000467119	0.000155731
hsa04975:Fat digestion and absorption	7	2.99145	3.79214e-05	PNLIP, CEL, CLPS, PNLIPRP1, PNLIPRP2, CD36, PLA2G1B	115	39	6879	10.7365	0.00623761	0.00156306
hsa04978:Mineral absorption	7	2.99145	7.67003e-05	FXYD2, MT1M, TRPV6, MT1H, MT1X, MT1G, MT1F	115	44	6879	9.5164	0.0125763	0.00252801
hsa04976:Bile secretion	7	2.99145	0.000930886	FXYD2, AQP8, EPHX1, CFTR, NR0B2, SLC4A4, AQP1	115	69	6879	6.06843	0.142443	0.0252861
hsa01230:Biosynthesis of amino acids	7	2.99145	0.00116545	BCAT1, CTH, MAT1A, PHGDH, PSAT1, GPT2, CBS	115	72	6879	5.81558	0.175032	0.027113
hsa00982:Drug metabolism - cytochrome P450	6	2.5641	0.00520283	GSTA1, GSTA2, GSTA3, AOX1, ADH1B, UGT2A3	115	68	6879	5.27801	0.577138	0.102003
hsa04610:Complement and coagulation cascades	6	2.5641	0.00553658	F11, C7, SERPINA5, C6, C5, F8	115	69	6879	5.20151	0.599913	0.0967772
hsa04964:Proximal tubule bicarbonate reclamation	4	1.7094	0.0061653	FXYD2, CA4, SLC4A4, AQP1	115	23	6879	10.403	0.639557	0.0970086
hsa04971:Gastric acid secretion	6	2.5641	0.00702364	KCNJ16, CCKBR, CHRM3, ATP4A, CFTR, SST	115	73	6879	4.9165	0.68745	0.100329
hsa00980:Metabolism of xenobiotics by cytochrome P450	6	2.5641	0.00743511	GSTA1, GSTA2, GSTA3, ADH1B, EPHX1, UGT2A3	115	74	6879	4.85006	0.70811	0.0975254
hsa05204:Chemical carcinogenesis	6	2.5641	0.0102626	GSTA1, GSTA2, GSTA3, ADH1B, EPHX1, UGT2A3	115	80	6879	4.4863	0.817697	0.12272
hsa03320:PPAR signaling pathway	5	2.13675	0.0246522	CD36, FABP4, ACADL, ADIPOQ, PLTP	115	67	6879	4.46398	0.983733	0.254861
hsa00480:Glutathione metabolism	4	1.7094	0.0519906	GSTA1, GSTA2, GSTA3, ANPEP	115	51	6879	4.69156	0.999851	0.444173
hsa04950:Maturity onset diabetes of the young	3	1.28205	0.068358	ONECUT1, IAPP, NR5A2	115	26	6879	6.90201	0.999992	0.518185
hsa00561:Glycerolipid metabolism	4	1.7094	0.0709753	PNLIP, CEL, PNLIPRP1, PNLIPRP2	115	58	6879	4.12534	0.999995	0.510586
hsa00750:Vitamin B6 metabolism	2	0.854701	0.0954367	AOX1, PSAT1	115	6	6879	19.9391	1	0.601259
